# Supplementary material
Source: MDPI journal article supplement (https://www.mdpi.com/1424-8247/14/10/1055)
Supplement: s1 [file s1]

**Chemical analysis of *C. intybus* leaf extract using UPLC-TOF-MS negative mode (ESI-)**

| Compound                            | Adducts   | Formula   | m/z      | Mass Error (ppm) |
|-------------------------------------|-----------|-----------|----------|------------------|
| benzoic acid                        | M-H       | C7H6O3    | 137.0249 | 3.6490           |
| gallic acid                         | M-H       | C7H6O5    | 137.0250 | 4.3788           |
| glutamic acid                       | M-H       | C5H9NO4   | 146.0454 | -3.4236          |
| tartaric acid                       | M-H       | C4H6O6    | 149.0089 | -2.0133          |
| p-coumaric acid                     | M-H       | C9H8O3    | 163.0397 | -1.9721          |
| caffeic acid                        | M-H       | C9H8O4    | 179.0344 | -3.3513          |
| Quinic acid                         | M-H       | C7H12O6   | 191.0563 | 1.0468           |
| Sinapinic acid                      | M-H       | C11H12O5  | 205.0605 | -3.1382          |
| Apigenin                            | M-H       | C15H10O5  | 270.0519 | -3.3327          |
| 4-Hydroxybenzoyl glucose            | M-H       | C13H16O8  | 299.0765 | -2.3405          |
| 4-Hydroxybenzoic acid 4-O-glucoside | M-H       | C13H16O8  | 299.0765 | -2.3405          |
| Quercitin                           | M-H       | C15H10O7  | 301.0349 | -1.6609          |
| Caftaric acid                       | M-H       | C13H12O9  | 304.0411 | 0.6430           |
| Chlorogenic acid isomers            | M-H       | C16H18O9  | 353.0882 | 1.1329           |
| Syringin                            | M-H, 2M-H | C17H24O9  | 371.1342 | -0.9281          |
| Kaempferol-7-O-glucoside            | M-H, 2M-H | C21H20O11 | 447.0926 | -1.5657          |
| Kaempferol-3O-glucoside             | M-H       | C21H20O12 | 447.0926 | -1.5657          |
| Luteolin-7-O-glucopyranoside        | M-H       | C21H20O13 | 447.0926 | -1.5657          |
| Chicoric acid                       | M-H, 2M-H | C22H18O12 | 473.0729 | 0.8455           |
| Quercitin-3-glucuronide             | M-H       | C21H18O13 | 477.0684 | 1.8865           |
| Dicaffeoyl quinic acid isomers      | M-H       | C25H24O12 | 515.1203 | 1.5530           |
| Rutin                               | M-H       | C27H30O16 | 609.1439 | -3.6116          |
