# Supplementary material
Source: MDPI journal article supplement (https://www.mdpi.com/1424-8247/14/10/1055)
Supplement: s1 [file s1]

Chemical analysis of *T. officinale* leaf extract using UPLC-TOF-MS positive ion mode (ESI+)

| Description                                                                 | Adducts   | Formula    | m/z      | Mass Error (ppm) |
|-----------------------------------------------------------------------------|-----------|------------|----------|------------------|
| Malonic acid                                                                | M+H       | C3H4O4     | 105.0185 | 2.3786           |
| Hydroxypyruvic acid                                                         | M+H       | C3H4O4     | 105.0185 | 2.3786           |
| Pyroglutamic acid                                                           | M+H       | C5H7NO3    | 130.0501 | 1.4459           |
| Adenine                                                                     | M+H       | C5H5N5     | 136.0621 | 2.8388           |
| Guanine                                                                     | M+H       | C5H5N5O    | 152.0571 | 2.6484           |
| Hydroxycoumarin                                                             | M+H       | C9H6O3     | 163.0391 | 0.8262           |
| Umbelliferone                                                               | M+H       | C9H6O3     | 163.0391 | 0.8262           |
| 4-Hydroxy-1-tetralone                                                       | M+H       | C10H10O2   | 163.0757 | 2.0149           |
| 2-Hydroxy-3,4-dihydro-1(2H)-naphthalenone                                   | M+H       | C10H10O2   | 163.0757 | 2.0149           |
| Phenylalanine                                                               | M+H       | C9H11NO2   | 166.0863 | 0.0658           |
| 5-Phenyl-1H-pyrrole-2-carboxylic acid                                       | M+H       | C11H9NO2   | 188.0710 | 2.0678           |
| 6-Methyl-2-quinolinecarboxylic acid                                         | M+H       | C11H9NO2   | 188.0710 | 2.0678           |
| Indoleacrylic acid                                                          | M+H       | C11H9NO2   | 188.0710 | 2.0678           |
| Tryptophan                                                                  | M+H       | C11H12N2O2 | 205.0972 | 0.0849           |
| Favan-3-ol                                                                  | M+H       | C15H14O2   | 227.1066 | -0.2026          |
| Flavan-4-ol                                                                 | M+H       | C15H14O2   | 227.1066 | -0.2026          |
| 7-Hydroxyflavan                                                             | M+H       | C15H14O2   | 227.1066 | -0.1922          |
| Leu-pro                                                                     | M+H       | C11H20N2O3 | 229.1548 | 0.5797           |
| Pro-Leu                                                                     | M+H       | C11H20N2O3 | 229.1548 | 0.5797           |
| Isozaluzanin C                                                              | M+H       | C15H18O3   | 247.1327 | -0.7731          |
| Zaluzanin C                                                                 | M+H       | C15H18O3   | 247.1327 | -0.7731          |
| Xerantholide                                                                | M+H       | C15H18O3   | 247.1327 | -0.7731          |
| Mycosporine                                                                 | M+H       | C11H19NO6  | 262.1291 | 2.0839           |
| (3S)-3-[(2-Carboxypropanoyl)oxy]-4-(trimethylammonio)butanoate              | M+H       | C11H19NO6  | 262.1291 | 2.0839           |
| Adenosine                                                                   | M+H       | C10H13N5O4 | 268.1044 | 1.3913           |
| vestitol                                                                    | M+H       | C16H16O4   | 273.1115 | -2.4077          |
| Guanosine                                                                   | M+H       | C10H13N5O5 | 284.0991 | 0.3939           |
| Luteolin                                                                    | M+H       | C15H10O6   | 287.0553 | 0.9135           |
| Kaempferol                                                                  | M+H       | C15H10O6   | 287.0553 | 0.9135           |
| Aureusidin                                                                  | M+H       | C15H10O6   | 287.0553 | 0.9135           |
| Maritimetin                                                                 | M+H       | C15H10O6   | 287.0553 | 0.9135           |
| Datiscetin                                                                  | M+H       | C15H10O6   | 287.0553 | 0.9135           |
| Isoscutellarein                                                             | M+H       | C15H10O6   | 287.0553 | 0.9135           |
| Scutellarein                                                                | M+H       | C15H10O6   | 287.0553 | 0.9135           |
| Kaempferol                                                                  | M+H       | C15H10O6   | 287.0555 | 1.6963           |
| Datiscetin                                                                  | M+H       | C15H10O6   | 287.0555 | 1.6963           |
| Luteolin                                                                    | M+H       | C15H10O6   | 287.0555 | 1.6963           |
| Pro-arg                                                                     | M+Na      | C11H21N5O3 | 294.1548 | 4.0663           |
| Arg-pro                                                                     | M+Na      | C11H21N5O3 | 294.1548 | 4.0663           |
| Caftaric acid                                                               | M+Na      | C13H12O9   | 335.0374 | 0.0779           |
| 1-O-(4-coumaroyl)-beta-D-glucose                                            | M+Na      | C15H18O8   | 349.0889 | -1.5590          |
| Melilotoside                                                                | M+Na      | C15H18O8   | 349.0889 | -1.5590          |
| p-Coumaric acid glucoside                                                   | M+Na      | C15H18O8   | 349.0889 | -1.5590          |
| Chlorogenic acid isomers                                                    | M+H       | C16H18O9   | 355.1019 | -1.3468          |
| Lactulose                                                                   | M+Na      | C12H22O11  | 365.1070 | 4.5663           |
| Melibiose                                                                   | M+Na      | C12H22O11  | 365.1070 | 4.5663           |
| Trehalulose                                                                 | M+Na      | C12H22O11  | 365.1070 | 4.5663           |
| Cellobiose                                                                  | M+Na      | C12H22O11  | 365.1070 | 4.5663           |
| Gentiobiose                                                                 | M+Na      | C12H22O11  | 365.1070 | 4.5663           |
| Trehalose                                                                   | M+Na      | C12H22O11  | 365.1070 | 4.5663           |
| Xanthogalenol                                                               | M+Na      | C21H22O5   | 377.1343 | -4.5530          |
| Xanthohumol                                                                 | M+Na      | C21H22O5   | 377.1343 | -4.5530          |
| Syringin                                                                    | M+Na      | C17H24O9   | 395.1315 | 0.6421           |
| 7-deoxyloganin                                                              | M+Na, M+K | C17H26O9   | 397.1473 | 1.1550           |
| 8-Epideoxyloganin                                                           | M+Na, M+K | C17H26O9   | 397.1473 | 1.1550           |
| Rehmanioside C                                                              | M+Na      | C19H32O8   | 411.1991 | 0.5149           |
| grandidentatin                                                              | M+Na, M+K | C21H28O9   | 447.1628 | 0.4946           |
| Plantaginin                                                                 | M+H       | C21H20O11  | 449.1080 | 0.2971           |
| Isoorientin                                                                 | M+H       | C21H20O11  | 449.1080 | 0.2971           |
| galuteolin                                                                  | M+H       | C21H20O11  | 449.1080 | 0.2971           |
| Trifolin                                                                    | M+H       | C21H20O11  | 449.1087 | 1.9134           |
| Kaempferol-3-glucoside                                                      | M+H       | C21H20O11  | 449.1087 | 1.9134           |
| abscisic acid glucoside                                                     | M+Na, M+K | C21H30O9   | 449.1785 | 0.6502           |
| Zizybeoside I                                                               | M+K       | C19H28O11  | 471.1267 | 0.9650           |
| Sakuranin                                                                   | M+Na      | C22H24O10  | 471.1267 | 1.2707           |
| Chicoric acid                                                               | M+Na      | C22H18O12  | 497.0697 | 1.3566           |
| Kaempferol 3-O-neohesperidoside                                             | M+H       | C27H30O15  | 595.1665 | 1.3045           |
| 5,7-Dihydroxy-2-(4-hydroxyphenyl)-4-oxo-4H-chromen-3-yl 6-O-(6-deoxyhe: M+H | M+H       | C27H30O15  | 595.1665 | 1.3045           |
| 3,5-Dihydroxy-2-(4-hydroxyphenyl)-4-oxo-4H-chromen-7-yl 2-O-(6-deoxyhe: M+H | M+H       | C27H30O15  | 595.1665 | 1.3045           |
| Isorhamnetin 3-arabino-glucoside                                            | M+H       | C27H30O16  | 611.1613 | 0.9870           |
| Multinoside A                                                               | M+H       | C27H30O16  | 611.1613 | 0.9870           |
| Rutin                                                                       | M+H       | C27H30O16  | 611.1613 | 0.9870           |
