# Supplementary material
Source: MDPI journal article supplement (https://www.mdpi.com/1424-8247/14/10/1055)
Supplement: s1 [file s1]

**Chemical analysis of *C. intybus* leaf extract using UPLC-TOF-MS positive mode (ESI+)**

| Description                    | Adducts   | Formula                                                      | m/z      | Mass Error (ppm) |
|--------------------------------|-----------|--------------------------------------------------------------|----------|------------------|
| Alanine                        | M+H       | C <sub>3</sub> H <sub>7</sub> NO <sub>2</sub>                | 90.0554  | 4.4417           |
| Asparagine                     | M+H       | C <sub>4</sub> H <sub>8</sub> N <sub>2</sub> O <sub>3</sub>  | 133.0610 | 1.5030           |
| Glutamine                      | M+H       | C <sub>5</sub> H <sub>10</sub> N <sub>2</sub> O <sub>3</sub> | 147.0771 | 4.7594           |
| Tartaric acid                  | M+H       | C <sub>4</sub> H <sub>6</sub> O <sub>6</sub>                 | 151.0231 | -3.9729          |
| caffeic acid                   | M+H, M+Na | C <sub>9</sub> H <sub>8</sub> O <sub>4</sub>                 | 181.0489 | -3.3140          |
| Fructose                       | M+H       | C <sub>6</sub> H <sub>12</sub> O <sub>6</sub>                | 181.0701 | -3.3136          |
| Glucose                        | M+H       | C <sub>6</sub> H <sub>12</sub> O <sub>6</sub>                | 181.0714 | 3.8659           |
| Tyrosine                       | M+H       | C <sub>9</sub> H <sub>11</sub> NO <sub>3</sub>               | 182.0754 | -0.5492          |
| Favan-3-ol                     | M+H       | C <sub>15</sub> H <sub>14</sub> O <sub>2</sub>               | 227.1070 | 1.3210           |
| Flavan-4-ol                    | M+H       | C <sub>15</sub> H <sub>14</sub> O <sub>2</sub>               | 227.1070 | 1.3210           |
| 7-Hydroxyflavan                | M+H       | C <sub>15</sub> H <sub>14</sub> O <sub>2</sub>               | 227.1070 | 1.3210           |
| Caftaric acid                  | M+H       | C <sub>13</sub> H <sub>12</sub> O <sub>9</sub>               | 313.0558 | 1.2778           |
| Sucrose                        | M+H       | C <sub>12</sub> H <sub>22</sub> O <sub>11</sub>              | 343.1219 | -4.6630          |
| p-Coumaric acid glucoside      | M+H, M+Na | C <sub>15</sub> H <sub>18</sub> O <sub>8</sub>               | 327.1069 | -1.5286          |
| Chlorogenic acid isomers       | M+H       | C <sub>16</sub> H <sub>18</sub> O <sub>9</sub>               | 355.1017 | -0.7836          |
| Cyanidine-3-O-glucoside        | M+        | C <sub>21</sub> H <sub>21</sub> O <sub>11</sub>              | 449.1078 | -0.6679          |
| Kaempferol-3-O-glucoside       | M+H       | C <sub>21</sub> H <sub>20</sub> O <sub>11</sub>              | 449.1085 | 1.4681           |
| Quercitin-3-glucuronide        | M+H       | C <sub>21</sub> H <sub>18</sub> O <sub>13</sub>              | 478.0733 | -2.9284          |
| Chicoric acid                  | M+H, M+Na | C <sub>22</sub> H <sub>18</sub> O <sub>12</sub>              | 497.0693 | 0.5519           |
| Dicaffeoyl quinic acid isomers | M+H       | C <sub>25</sub> H <sub>24</sub> O <sub>12</sub>              | 517.1339 | -0.3867          |
| Rutin                          | M+H       | C <sub>27</sub> H <sub>30</sub> O <sub>16</sub>              | 611.1634 | -2.4491          |
