# Supplementary material
Source: MDPI journal article supplement (https://www.mdpi.com/1424-8247/14/10/1055)
Supplement: s1 [file s1]

**Chemical analysis of *T. officinale* leaf extract using UPLC-TOF-MS negative ion mode (ESI-)**

| Compound                                                                                                | Adducts                   | Formula                                                       | m/z      | Mass Error (ppm) |
|---------------------------------------------------------------------------------------------------------|---------------------------|---------------------------------------------------------------|----------|------------------|
| 4-Methoxyphenoxyacetic acid                                                                             | M-H <sub>2</sub> O-H      | C <sub>9</sub> H <sub>10</sub> O <sub>4</sub>                 | 163.0396 | -2.6145          |
| p-coumaric acid                                                                                         | M-H                       | C <sub>9</sub> H <sub>8</sub> O <sub>3</sub>                  | 163.0396 | -2.9362          |
| 5,8-dihydroxycoumarin                                                                                   | M-H                       | C <sub>9</sub> H <sub>6</sub> O <sub>4</sub>                  | 177.0187 | -3.6158          |
| 6,7-Dihydroxycoumarin                                                                                   | M-H                       | C <sub>9</sub> H <sub>6</sub> O <sub>4</sub>                  | 177.0187 | -3.6158          |
| 5,7-Dihydroxycoumarin                                                                                   | M-H                       | C <sub>9</sub> H <sub>6</sub> O <sub>4</sub>                  | 177.0187 | -3.6158          |
| Citric acid                                                                                             | M-H <sub>2</sub> O-H, M-H | C <sub>6</sub> H <sub>8</sub> O <sub>7</sub>                  | 191.0194 | -1.9561          |
| 4-Methylesculetin                                                                                       | M-H                       | C <sub>10</sub> H <sub>8</sub> O <sub>4</sub>                 | 191.0344 | -2.7850          |
| 5,7-Dihydroxy-4-methylcoumarin                                                                          | M-H                       | C <sub>10</sub> H <sub>8</sub> O <sub>4</sub>                 | 191.0344 | -2.7850          |
| Quinic acid                                                                                             | M-H                       | C <sub>7</sub> H <sub>12</sub> O <sub>6</sub>                 | 191.0560 | -0.5738          |
| Sinapinic acid                                                                                          | M-H <sub>2</sub> O-H      | C <sub>11</sub> H <sub>12</sub> O <sub>5</sub>                | 205.0503 | -1.3059          |
| Pro-Glu                                                                                                 | M-H <sub>2</sub> O-H      | C <sub>10</sub> H <sub>16</sub> N <sub>2</sub> O <sub>5</sub> | 225.0876 | -2.0003          |
| Glu-pro                                                                                                 | M-H <sub>2</sub> O-H      | C <sub>10</sub> H <sub>16</sub> N <sub>2</sub> O <sub>5</sub> | 225.0876 | -2.0003          |
| Taraxinic acid                                                                                          | M-H                       | C <sub>15</sub> H <sub>18</sub> O <sub>4</sub>                | 261.1133 | 0.4091           |
| Pratol                                                                                                  | M-H                       | C <sub>16</sub> H <sub>12</sub> O <sub>4</sub>                | 267.0662 | -0.3047          |
| 6-Hydroxy-2'-methoxyflavone                                                                             | M-H                       | C <sub>16</sub> H <sub>12</sub> O <sub>4</sub>                | 267.0662 | -0.3047          |
| 2-O-(alpha-D-glucopyranosyl)-D-glyceric acid                                                            | M-H                       | C <sub>9</sub> H <sub>16</sub> O <sub>9</sub>                 | 267.0721 | -0.2615          |
| 2-(alpha-D-mannosyl)-D-glyceric acid                                                                    | M-H                       | C <sub>9</sub> H <sub>16</sub> O <sub>9</sub>                 | 267.0721 | -0.2615          |
| Luteolin                                                                                                | M-H                       | C <sub>15</sub> H <sub>10</sub> O <sub>6</sub>                | 285.0395 | -3.3762          |
| Chrysoeriol                                                                                             | M-H                       | C <sub>16</sub> H <sub>12</sub> O <sub>6</sub>                | 299.0548 | -4.4455          |
| Sorbifolin                                                                                              | M-H                       | C <sub>16</sub> H <sub>12</sub> O <sub>6</sub>                | 299.0548 | -4.4455          |
| Hispidulin                                                                                              | M-H                       | C <sub>16</sub> H <sub>12</sub> O <sub>6</sub>                | 299.0548 | -4.4455          |
| Rhamnocitrin                                                                                            | M-H                       | C <sub>16</sub> H <sub>12</sub> O <sub>6</sub>                | 299.0548 | -4.4455          |
| 4-Hydroxybenzoyl glucose                                                                                | M-H                       | C <sub>13</sub> H <sub>16</sub> O <sub>8</sub>                | 299.0761 | -3.8020          |
| 4-Hydroxybenzoic acid 4-O-glucoside                                                                     | M-H                       | C <sub>13</sub> H <sub>16</sub> O <sub>8</sub>                | 299.0761 | -3.8020          |
| glucosyl salicylate                                                                                     | M-H                       | C <sub>13</sub> H <sub>16</sub> O <sub>8</sub>                | 299.0761 | -3.8020          |
| Caftaric acid                                                                                           | M-H                       | C <sub>13</sub> H <sub>12</sub> O <sub>9</sub>                | 311.0409 | 0.2301           |
| gentisic acid 5-beta-glucoside                                                                          | M-H                       | C <sub>13</sub> H <sub>16</sub> O <sub>9</sub>                | 315.0713 | -2.6976          |
| Fertaric acid                                                                                           | M-H <sub>2</sub> O-H, M-H | C <sub>14</sub> H <sub>14</sub> O <sub>9</sub>                | 325.0559 | -2.3264          |
| sinapoyltartronic acid                                                                                  | M-H <sub>2</sub> O-H, M-H | C <sub>14</sub> H <sub>14</sub> O <sub>9</sub>                | 325.0559 | -2.3264          |
| 6-O-Galloylglucose                                                                                      | M-H                       | C <sub>13</sub> H <sub>16</sub> O <sub>10</sub>               | 331.0656 | -4.4879          |
| Glucogallin                                                                                             | M-H                       | C <sub>13</sub> H <sub>16</sub> O <sub>10</sub>               | 331.0656 | -4.4879          |
| Ascorbyl glucoside                                                                                      | M-H                       | C <sub>12</sub> H <sub>18</sub> O <sub>11</sub>               | 337.0779 | 0.8319           |
| dalpatein                                                                                               | M-H                       | C <sub>18</sub> H <sub>14</sub> O <sub>7</sub>                | 341.0668 | 0.3146           |
| Rosmarinic acid                                                                                         | M-H <sub>2</sub> O-H      | C <sub>18</sub> H <sub>16</sub> O <sub>8</sub>                | 341.0668 | 0.3147           |
| Chlorogenic acid isomers                                                                                | M-H                       | C <sub>16</sub> H <sub>18</sub> O <sub>9</sub>                | 353.0872 | -1.7756          |
| Syringin                                                                                                | M-H                       | C <sub>17</sub> H <sub>24</sub> O <sub>9</sub>                | 371.1346 | -0.4712          |
| abscisic acid glucoside                                                                                 | M-H                       | C <sub>21</sub> H <sub>30</sub> O <sub>9</sub>                | 425.1810 | -1.7007          |
| 6-Hydroxyluteolin 7-glucoside                                                                           | M-H <sub>2</sub> O-H      | C <sub>21</sub> H <sub>20</sub> O <sub>12</sub>               | 445.0776 | -0.1085          |
| Hypolaetin-8-glucoside                                                                                  | M-H <sub>2</sub> O-H      | C <sub>21</sub> H <sub>20</sub> O <sub>12</sub>               | 445.0776 | -0.1085          |
| Gossypetin 8-rhamnoside                                                                                 | M-H <sub>2</sub> O-H      | C <sub>21</sub> H <sub>20</sub> O <sub>12</sub>               | 445.0776 | -0.1085          |
| Genistein-7-O-glucuronide                                                                               | M-H                       | C <sub>21</sub> H <sub>18</sub> O <sub>11</sub>               | 445.0779 | 0.6321           |
| 7-Hydroxy-3-(4-hydroxyphenyl)-4-oxo-4H-chromen-5-yl beta-D-glucopyranosiduronic acid                    | M-H                       | C <sub>21</sub> H <sub>18</sub> O <sub>11</sub>               | 445.0779 | 0.6321           |
| apigenin 7-glucuronide                                                                                  | M-H                       | C <sub>21</sub> H <sub>18</sub> O <sub>11</sub>               | 445.0779 | 0.6321           |
| apigenin 7-glucuronide                                                                                  | M-H                       | C <sub>21</sub> H <sub>18</sub> O <sub>11</sub>               | 445.0788 | 2.6623           |
| Genistein-7-O-glucuronide                                                                               | M-H                       | C <sub>21</sub> H <sub>18</sub> O <sub>11</sub>               | 445.0788 | 2.6623           |
| Luteolin-5-O-glucopyranoside                                                                            | M-H                       | C <sub>21</sub> H <sub>20</sub> O <sub>11</sub>               | 447.0935 | 0.5352           |
| Kaempferol-7-O-glucoside                                                                                | M-H                       | C <sub>21</sub> H <sub>20</sub> O <sub>11</sub>               | 447.0935 | 0.5352           |
| Luteolin-7-O-glucopyranoside                                                                            | M-H                       | C <sub>21</sub> H <sub>20</sub> O <sub>11</sub>               | 447.0935 | 0.5352           |
| Carthamone                                                                                              | M-H, 2M-H                 | C <sub>21</sub> H <sub>20</sub> O <sub>11</sub>               | 447.0947 | 3.1519           |
| Plantagin                                                                                               | M-H, 2M-H                 | C <sub>21</sub> H <sub>20</sub> O <sub>11</sub>               | 447.0947 | 3.1519           |
| Kaempferol-7-O-glucoside                                                                                | M-H, 2M-H                 | C <sub>21</sub> H <sub>20</sub> O <sub>11</sub>               | 447.0947 | 3.1519           |
| Isorhamnetin 4'-O-glucuronide                                                                           | M-H <sub>2</sub> O-H      | C <sub>22</sub> H <sub>20</sub> O <sub>13</sub>               | 473.0736 | 2.0915           |
| Chicoric acid                                                                                           | M-H                       | C <sub>22</sub> H <sub>18</sub> O <sub>12</sub>               | 473.0738 | 2.6795           |
| Carmine                                                                                                 | M-H                       | C <sub>22</sub> H <sub>20</sub> O <sub>13</sub>               | 491.0836 | 0.9801           |
| Isorhamnetin 4'-O-glucuronide                                                                           | M-H                       | C <sub>22</sub> H <sub>20</sub> O <sub>13</sub>               | 491.0836 | 0.9801           |
| Raffinose                                                                                               | M-H                       | C <sub>18</sub> H <sub>32</sub> O <sub>16</sub>               | 503.1626 | 1.5941           |
| Maltotriose                                                                                             | M-H                       | C <sub>18</sub> H <sub>32</sub> O <sub>16</sub>               | 503.1626 | 1.5941           |
| D-Cellotriose                                                                                           | M-H                       | C <sub>18</sub> H <sub>32</sub> O <sub>16</sub>               | 503.1626 | 1.5941           |
| Isomaltotriose                                                                                          | M-H                       | C <sub>18</sub> H <sub>32</sub> O <sub>16</sub>               | 503.1626 | 1.5941           |
| Dicaffeoylquinic acid isomers                                                                           | M-H                       | C <sub>25</sub> H <sub>24</sub> O <sub>12</sub>               | 515.1199 | 0.7406           |
| 5,7-Dihydroxy-2-(4-hydroxyphenyl)-4-oxo-4H-chromen-3-yl 5-O-beta-D-glucopyranosyl-beta-D-xylofuranoside | M-H                       | C <sub>26</sub> H <sub>28</sub> O <sub>15</sub>               | 579.1370 | 2.5476           |
| 5,7-Dihydroxy-2-(4-hydroxyphenyl)-4-oxo-4H-chromen-3-yl 6-O-beta-D-xylofuranosyl-beta-D-glucopyranoside | M-H                       | C <sub>26</sub> H <sub>28</sub> O <sub>15</sub>               | 579.1370 | 2.5476           |
| Luteolin 7-O-rutinoside                                                                                 | M-H                       | C <sub>27</sub> H <sub>30</sub> O <sub>15</sub>               | 593.1518 | 0.9918           |
| Luteolin-7-O-neohesperidoside                                                                           | M-H                       | C <sub>27</sub> H <sub>30</sub> O <sub>15</sub>               | 593.1518 | 0.9918           |
| Kaempferol 3-O-neohesperidoside                                                                         | M-H                       | C <sub>27</sub> H <sub>30</sub> O <sub>15</sub>               | 593.1518 | 0.9918           |
| Multinose A                                                                                             | M-H                       | C <sub>27</sub> H <sub>30</sub> O <sub>16</sub>               | 609.1470 | 1.4808           |
| luteolin-7-O-gentiobioside                                                                              | M-H                       | C <sub>27</sub> H <sub>30</sub> O <sub>16</sub>               | 609.1470 | 1.4808           |
| Quercetin 3-O-rhamnoside 7-O-glucoside                                                                  | M-H                       | C <sub>27</sub> H <sub>30</sub> O <sub>16</sub>               | 609.1470 | 1.4808           |
| Rutin                                                                                                   | M-H                       | C <sub>27</sub> H <sub>30</sub> O <sub>16</sub>               | 609.1470 | 1.4808           |
